# Supplementary material for: Cesium lead bromide semiconductor radiation detectors: crystal growth, detector performance and polarization
Source: Royal Society of Chemistry journal article supplement (doi:10.1039/d2tc01679f), 2022-01-01
Supplement: d2tc01679f1.pdf [file d2tc01679f1.pdf]

Supporting Information:

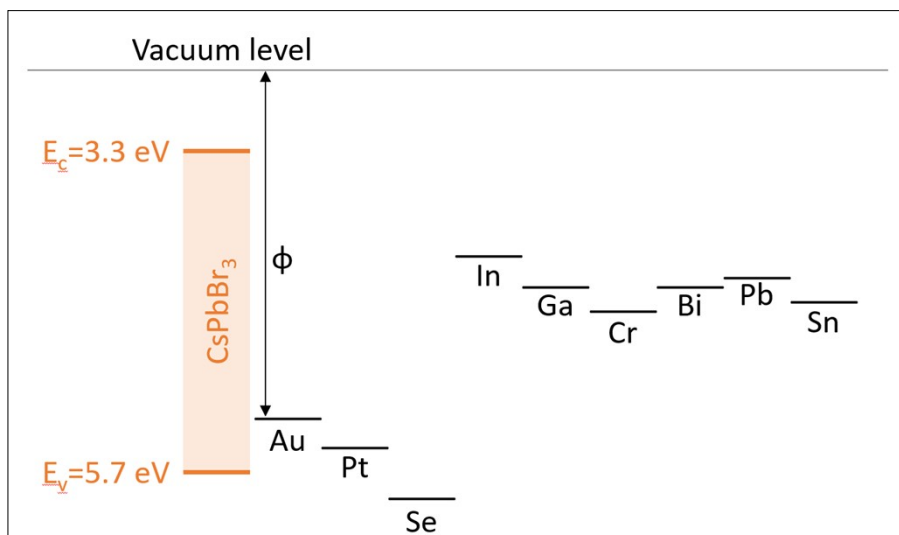

Figure S1. Energy band diagram of CsPbBr<sub>3</sub> and work function of different metal contacts.

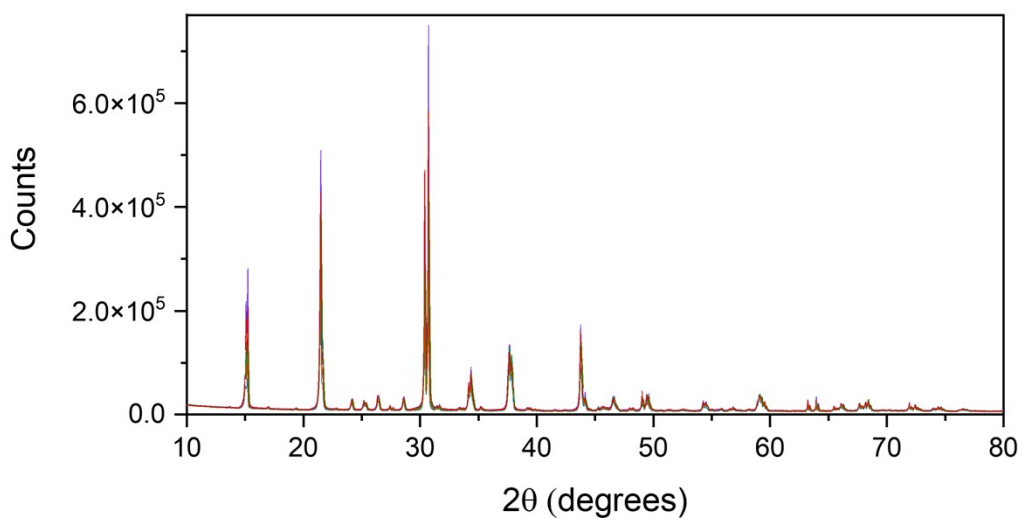

Figure S2. Powder XRD plot of a series of parallel crystal. The peak positions are consistent with an orthorhombic crystal structure.
